# Supplementary material
Source: ML conference proceedings conference paper supplement (https://proceedings.mlr.press/v130/lin21b.html)
Supplement: Supplementary file [file lin21b-supp.pdf]

## Appendix

### A Proof of Lemma 2

Assume that the samples of  $D_i$  datasets are  $x_1^i, \dots, x_m^i$ . Without loss of generality, we assume that  $x_i^0 = x_i^1$  for  $1 \leq i \leq m-1$ . Then we have

$$\begin{aligned} d_{\mathcal{F}}(\hat{\mu}_m^0, \hat{\mu}_m^1) &= \sup_{f \in \mathcal{F}} \{ \mathbb{E}_{x \sim \hat{\mu}_m^0} [f(x)] - \mathbb{E}_{x \sim \hat{\mu}_m^1} [f(x)] \} \\ &= \sup_{f \in \mathcal{F}} \left\{ \frac{1}{m} \sum_{i=1}^m f(x_i^0) - \frac{1}{m} \sum_{i=1}^m f(x_i^1) \right\} \\ &= \frac{1}{m} \sup_{f \in \mathcal{F}} \{ f(x_m^0) - f(x_m^1) \} \\ &\leq \frac{2\Delta}{m} \end{aligned}$$

### B Proof of Lemma 3

From Lemma 1, we know that

$$\begin{aligned} \mathbb{P} \left[ d_{\mathcal{F}}(\hat{\mu}_m^0, g_0) > \frac{1}{2} \tau_{k,\xi} \right] &\leq \xi \\ \mathbb{P} \left[ d_{\mathcal{F}}(\hat{\mu}_m^1, g_1) > \frac{1}{2} \tau_{k,\xi} \right] &\leq \xi \end{aligned}$$

Therefore,

$$\mathbb{P} \left[ d_{\mathcal{F}}(\hat{\mu}_m^0, g_0) \leq \frac{1}{2} \tau_{k,\xi} \wedge d_{\mathcal{F}}(\hat{\mu}_m^1, g_1) \leq \frac{1}{2} \tau_{k,\xi} \right] \geq 1 - 2\xi.$$

With probability at least  $1 - 2\xi$ , we have

$$\begin{aligned} d_{\mathcal{F}}(g_0, g_1) &= \sup_{f \in \mathcal{F}} \{ \mathbb{E}_{x \sim g_0} [f(x)] - \mathbb{E}_{x \sim g_1} [f(x)] \} \\ &= \sup_{f \in \mathcal{F}} \{ \mathbb{E}_{x \sim g_0} [f(x)] - \mathbb{E}_{x \sim \hat{\mu}_m^0} [f(x)] + \mathbb{E}_{x \sim \hat{\mu}_m^0} [f(x)] - \mathbb{E}_{x \sim \hat{\mu}_m^1} [f(x)] + \mathbb{E}_{x \sim \hat{\mu}_m^1} [f(x)] - \mathbb{E}_{x \sim g_1} [f(x)] \} \\ &\leq \sup_{f \in \mathcal{F}} \{ \mathbb{E}_{x \sim g_0} [f(x)] - \mathbb{E}_{x \sim \hat{\mu}_m^0} [f(x)] \} + \sup_{f \in \mathcal{F}} \{ \mathbb{E}_{x \sim \hat{\mu}_m^0} [f(x)] - \mathbb{E}_{x \sim \hat{\mu}_m^1} [f(x)] \} \\ &\quad + \sup_{f \in \mathcal{F}} \{ \mathbb{E}_{x \sim \hat{\mu}_m^1} [f(x)] - \mathbb{E}_{x \sim g_1} [f(x)] \} \\ &= \sup_{f \in \mathcal{F}} \{ \mathbb{E}_{x \sim \hat{\mu}_m^0} [f(x)] - \mathbb{E}_{x \sim g_0} [f(x)] \} + \sup_{f \in \mathcal{F}} \{ \mathbb{E}_{x \sim \hat{\mu}_m^0} [f(x)] - \mathbb{E}_{x \sim \hat{\mu}_m^1} [f(x)] \} \\ &\quad + \sup_{f \in \mathcal{F}} \{ \mathbb{E}_{x \sim \hat{\mu}_m^1} [f(x)] - \mathbb{E}_{x \sim g_1} [f(x)] \} \\ &\quad (\mathcal{F} \text{ is even}) \\ &= d_{\mathcal{F}}(\hat{\mu}_m^0, g_0) + d_{\mathcal{F}}(\hat{\mu}_m^0, \hat{\mu}_m^1) + d_{\mathcal{F}}(\hat{\mu}_m^1, g_1) \\ &\leq \tau_{k,\xi} + \frac{2\Delta}{m} \end{aligned}$$

## C Proof of Lemma 5

Define  $\rho_p, \rho_q$  as the probability (density) functions of  $p$  and  $q$  respectively. Assume set  $S_0 = \{x : \log \rho_p(x) - \log \rho_q(x) \geq \epsilon\}$ , then  $\forall x \in S_0$ , we have  $\rho_p(x) \geq \rho_q(x)e^\epsilon$ , and

$$\begin{aligned} s &\geq d_{\text{KL}}(p, q) + d_{\text{KL}}(q, p) \\ &= \int_x (\rho_p(x) - \rho_q(x)) (\log \rho_p(x) - \log \rho_q(x)) \\ &\geq \int_S (\rho_p(x) - \rho_q(x)) (\log \rho_p(x) - \log \rho_q(x)) \\ &\quad (\text{because } (\rho_p(x) - \rho_q(x)) (\log \rho_p(x) - \log \rho_q(x)) \geq 0 \quad \forall x) \\ &\geq \int_S \rho_p(x) (1 - e^{-\epsilon}) \epsilon \end{aligned}$$

i.e.  $\mathbb{P}[M(D_0) \in S_0] \leq \frac{s}{\epsilon(1-e^{-\epsilon})}$ . For any set  $S$ , we have

$$\begin{aligned} \mathbb{P}[M(D_0) \in S \setminus S_0] &= \int_{S \setminus S_0} \rho_p(x) dx \\ &\leq \int_{S \setminus S_0} \rho_q(x) e^\epsilon dx \\ &= e^\epsilon \mathbb{P}[M(D_1) \in S \setminus S_0] \end{aligned}$$

## D Proof of Lemma 6

Recall that in Appendix D we get

$$\mathbb{P}\left[d_{\mathcal{F}}(\hat{\mu}_m^0, g_0) \leq \frac{1}{2}\tau_{k,\xi} \wedge d_{\mathcal{F}}(\hat{\mu}_m^1, g_1) \leq \frac{1}{2}\tau_{k,\xi}\right] \geq 1 - 2\xi.$$

With probability at least  $1 - 2\xi$ , we have

$$\begin{aligned} d_{\mathcal{F}}(g_0, g_1) &= \sup_{f \in \mathcal{F}} \{\mathbb{E}_{x \sim g_0} [f(x)] - \mathbb{E}_{x \sim g_1} [f(x)]\} \\ &= \sup_{f \in \mathcal{F}} \{\mathbb{E}_{x \sim g_0} [f(x)] - \mathbb{E}_{x \sim \hat{\mu}_m^0} [f(x)] + \mathbb{E}_{x \sim \hat{\mu}_m^0} [f(x)] - \mathbb{E}_{x \sim \hat{\mu}_m^1} [f(x)] + \mathbb{E}_{x \sim \hat{\mu}_m^1} [f(x)] - \mathbb{E}_{x \sim g_1} [f(x)]\} \\ &\geq - \sup_{f \in \mathcal{F}} \{\mathbb{E}_{x \sim g_0} [f(x)] - \mathbb{E}_{x \sim \hat{\mu}_m^0} [f(x)]\} + \sup_{f \in \mathcal{F}} \{\mathbb{E}_{x \sim \hat{\mu}_m^0} [f(x)] - \mathbb{E}_{x \sim \hat{\mu}_m^1} [f(x)]\} \\ &\quad - \sup_{f \in \mathcal{F}} \{\mathbb{E}_{x \sim \hat{\mu}_m^1} [f(x)] - \mathbb{E}_{x \sim g_1} [f(x)]\} \\ &= -d_{\mathcal{F}}(\hat{\mu}_m^0, g_0) + d_{\mathcal{F}}(\hat{\mu}_m^0, \hat{\mu}_m^1) - d_{\mathcal{F}}(\hat{\mu}_m^1, g_1) \\ &\geq \frac{\Delta'}{2m} - \tau_{k,\xi} \end{aligned}$$

## E Proof of Lemma 7

Assume that  $S = \{x \in X | p(x) > q(x)\}$  and  $T = X \setminus S = \{x \in X | p(x) \leq q(x)\}$ . Let  $a_1 = \int_{x \in S} p(x) dx$ ,  $b_1 = \int_{x \in S} q(x) dx$ ,  $a_2 = \int_{x \in T} p(x) dx$ , and  $b_2 = \int_{x \in T} q(x) dx$ . Because of the the differential privacy guarantee, we have

$$\begin{aligned} a_1 - \delta &\leq e^\epsilon b_1 \\ b_2 - \delta &\leq e^\epsilon a_2 \end{aligned}$$

Note that  $a_1 + a_2 = 1$ ,  $b_1 + b_2 = 1$ . Therefore, we have

$$b_1 + a_2 \geq \frac{2 - 2\delta}{1 + e^\epsilon}$$

and

$$d_{\text{TV}}(p, q) = \frac{a_1 + b_2 - b_1 - a_2}{2} \leq \frac{e^\epsilon + 2\delta - 1}{e^\epsilon + 1}.$$
